# Supplementary material for: Exploring Antimicrobial Features for New Imidazo[4,5-b]pyridine Derivatives Based on Experimental and Theoretical Study
Source: MDPI journal article supplement (doi:10.3390/molecules28073197), 2023-04-04
Supplement: s1 [file s1]

Exploring antimicrobial feature for new imidazo[4,5-b] pyridine Derivatives based on experimental and theoretical study

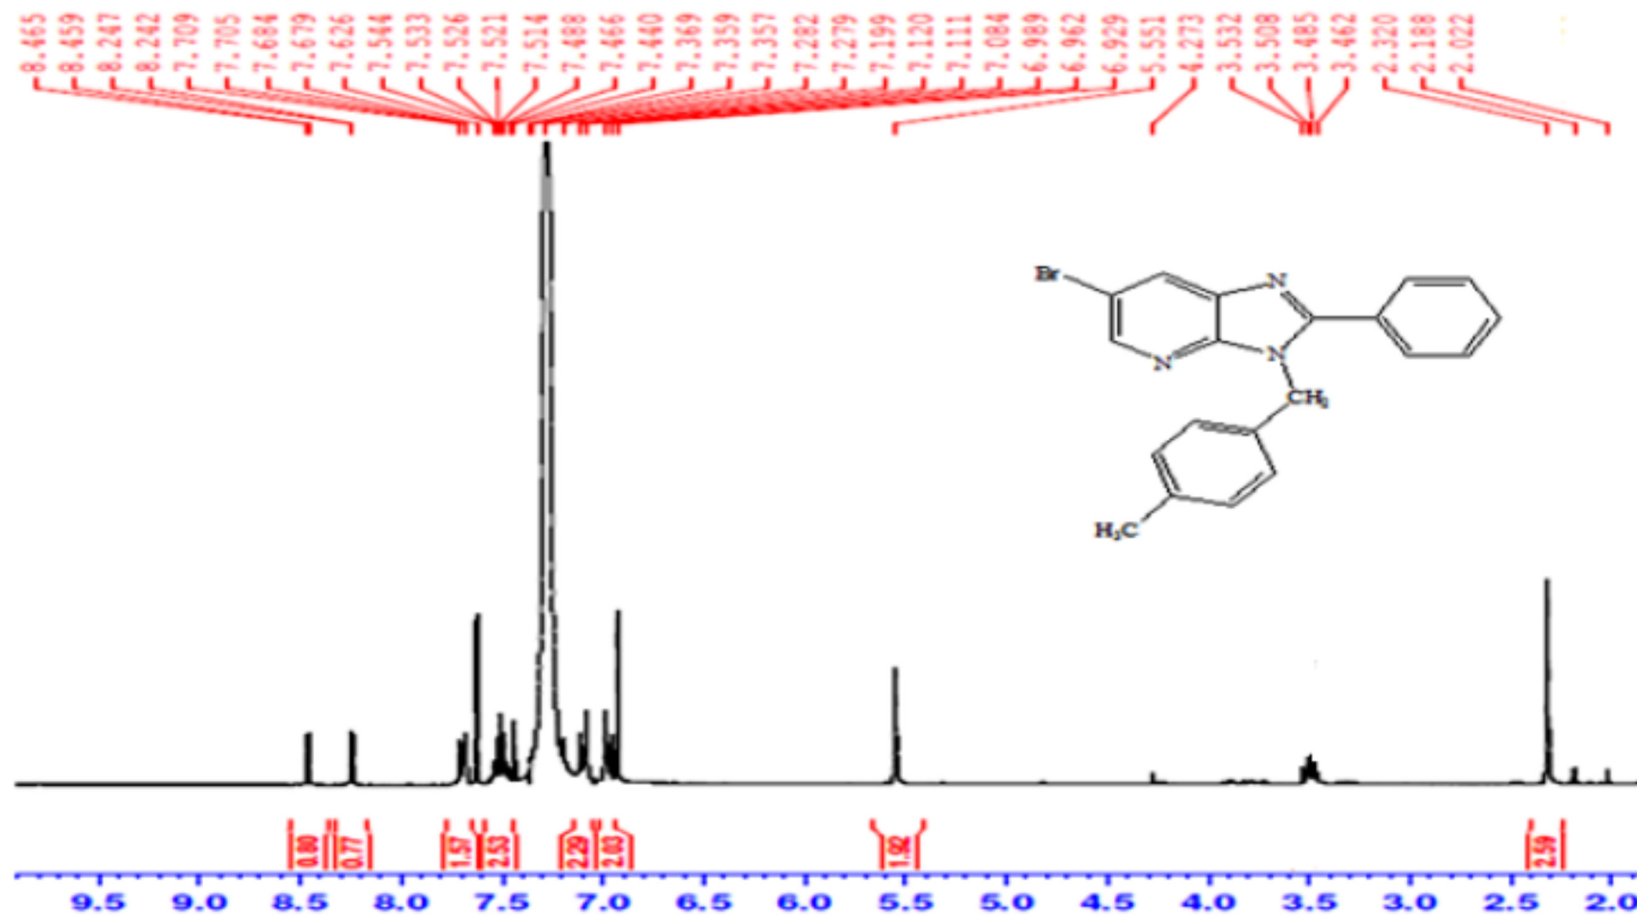

Figure S1: <sup>1</sup>H NMR spectrum of 4

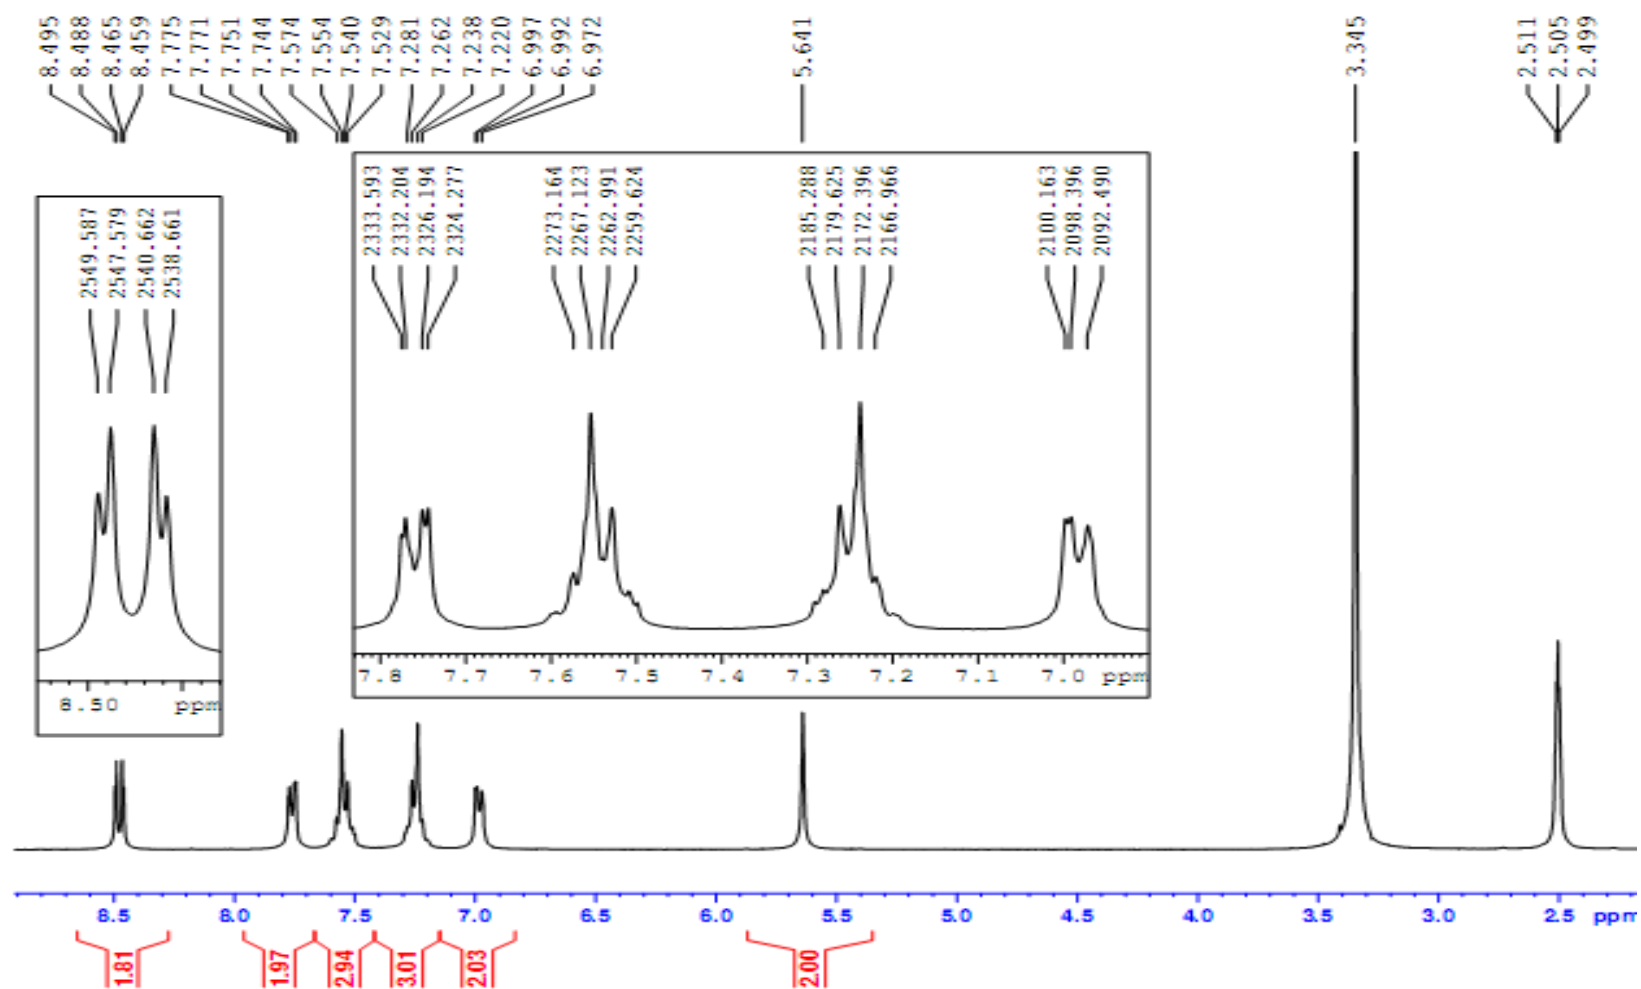

Figure S2:  $^1\text{H}$  NMR spectrum of **6**

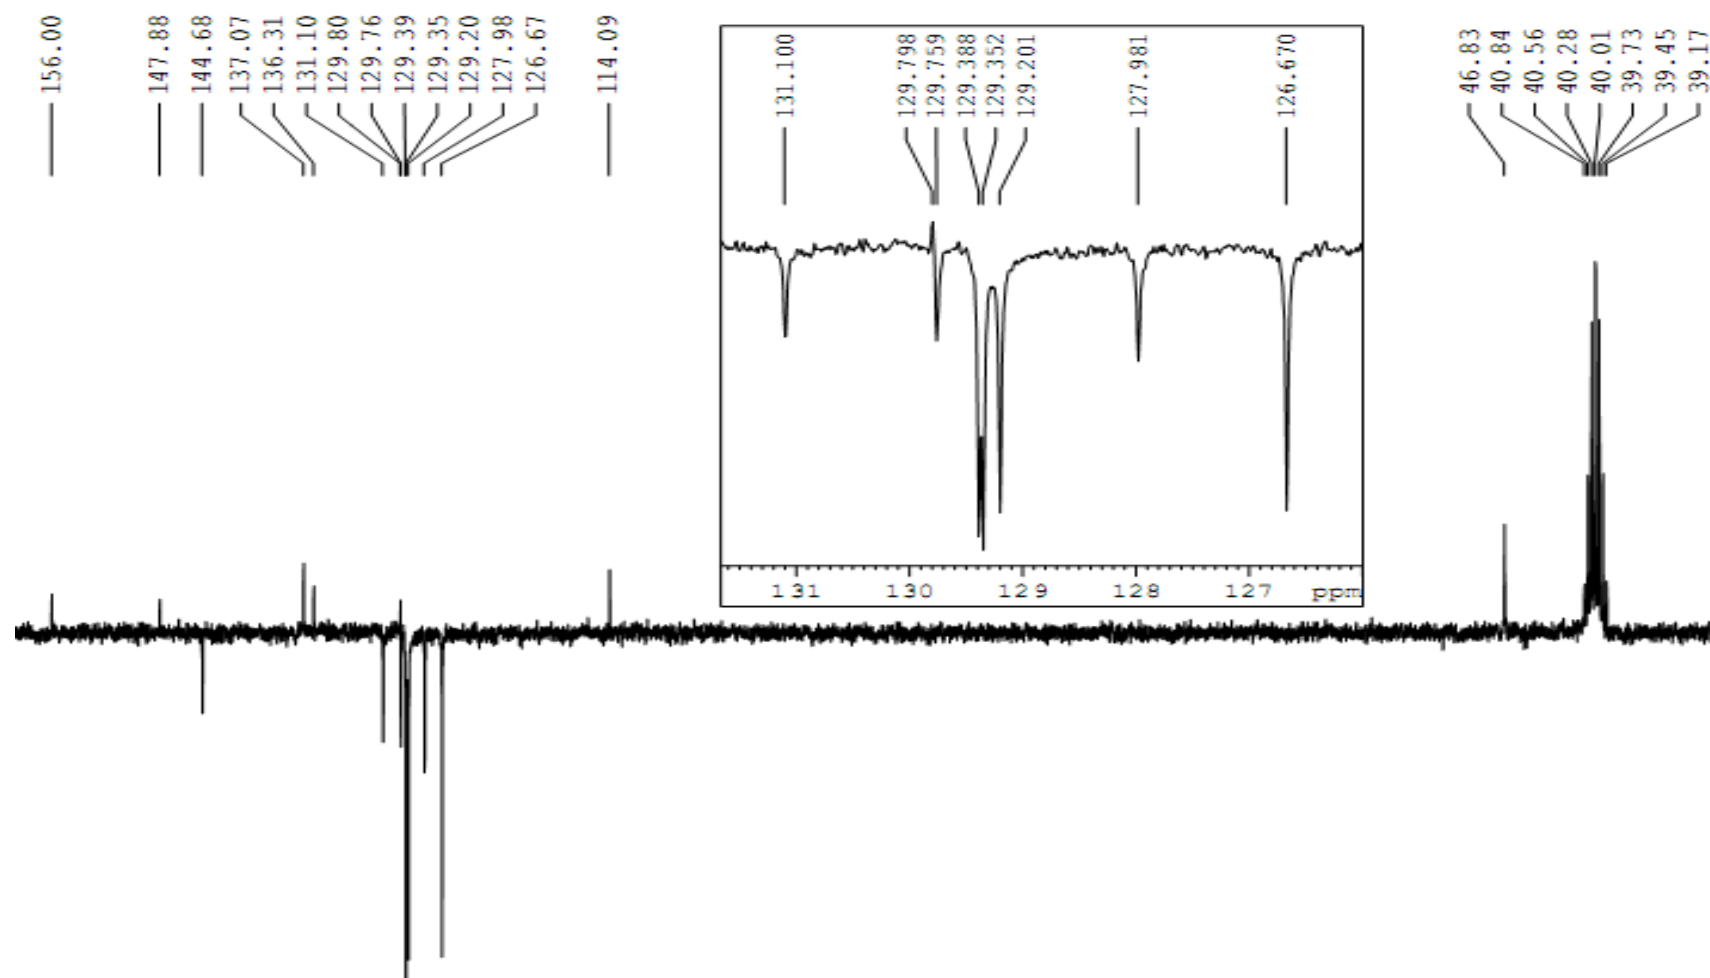

Figure S3:  $^{13}\text{C}$  NMR spectrum of 6

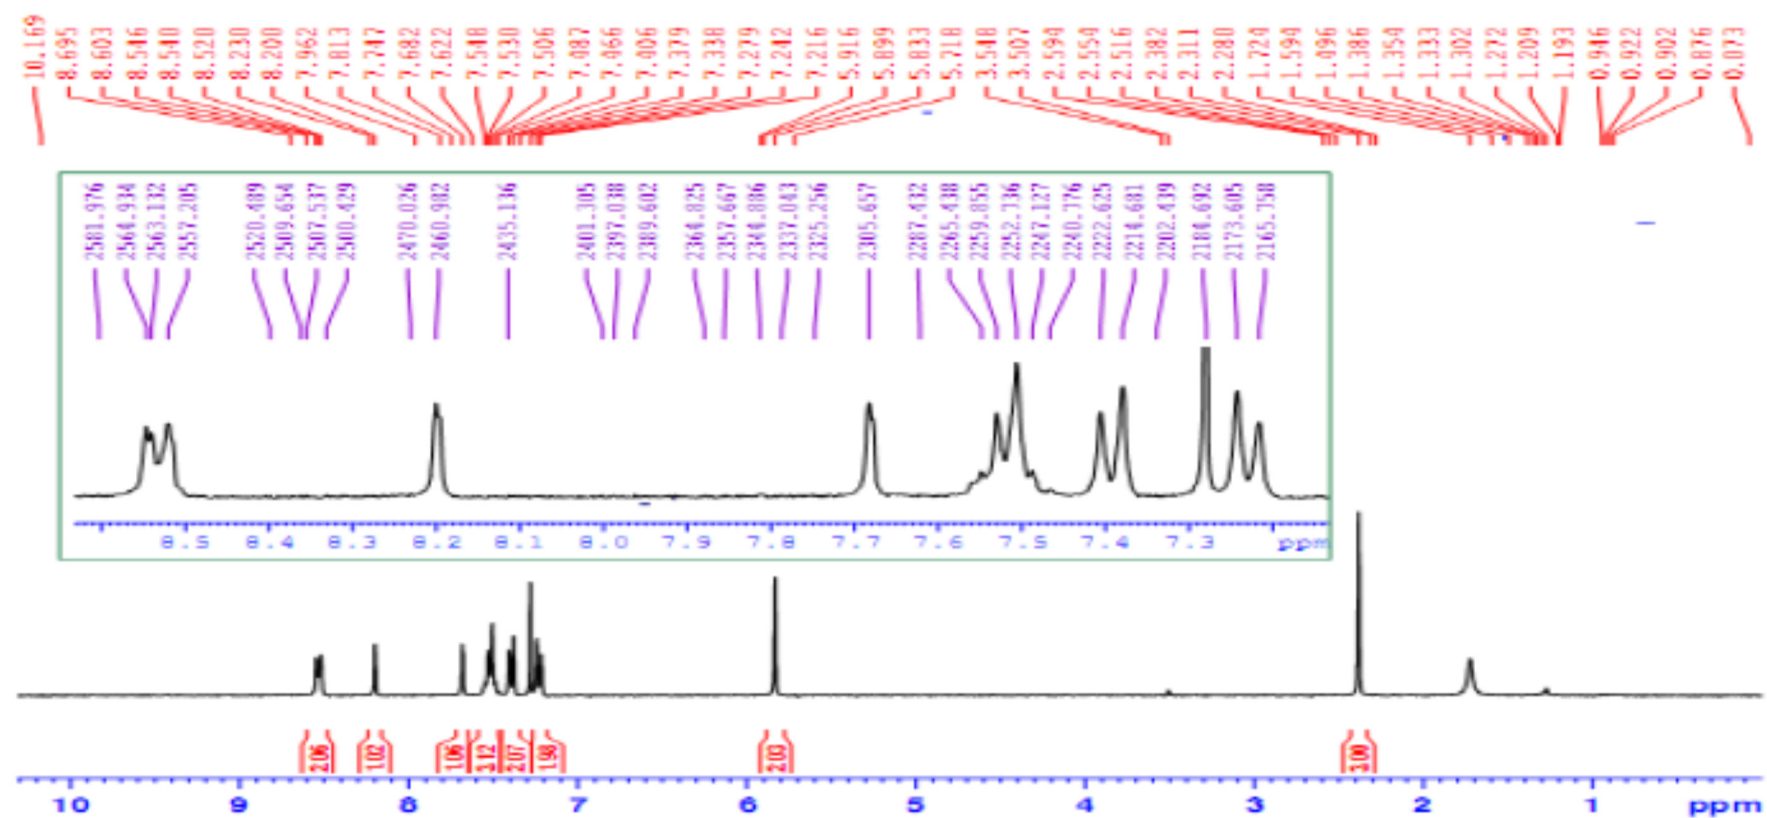

Figure S4:  $^1\text{H}$  NMR spectrum of **7**

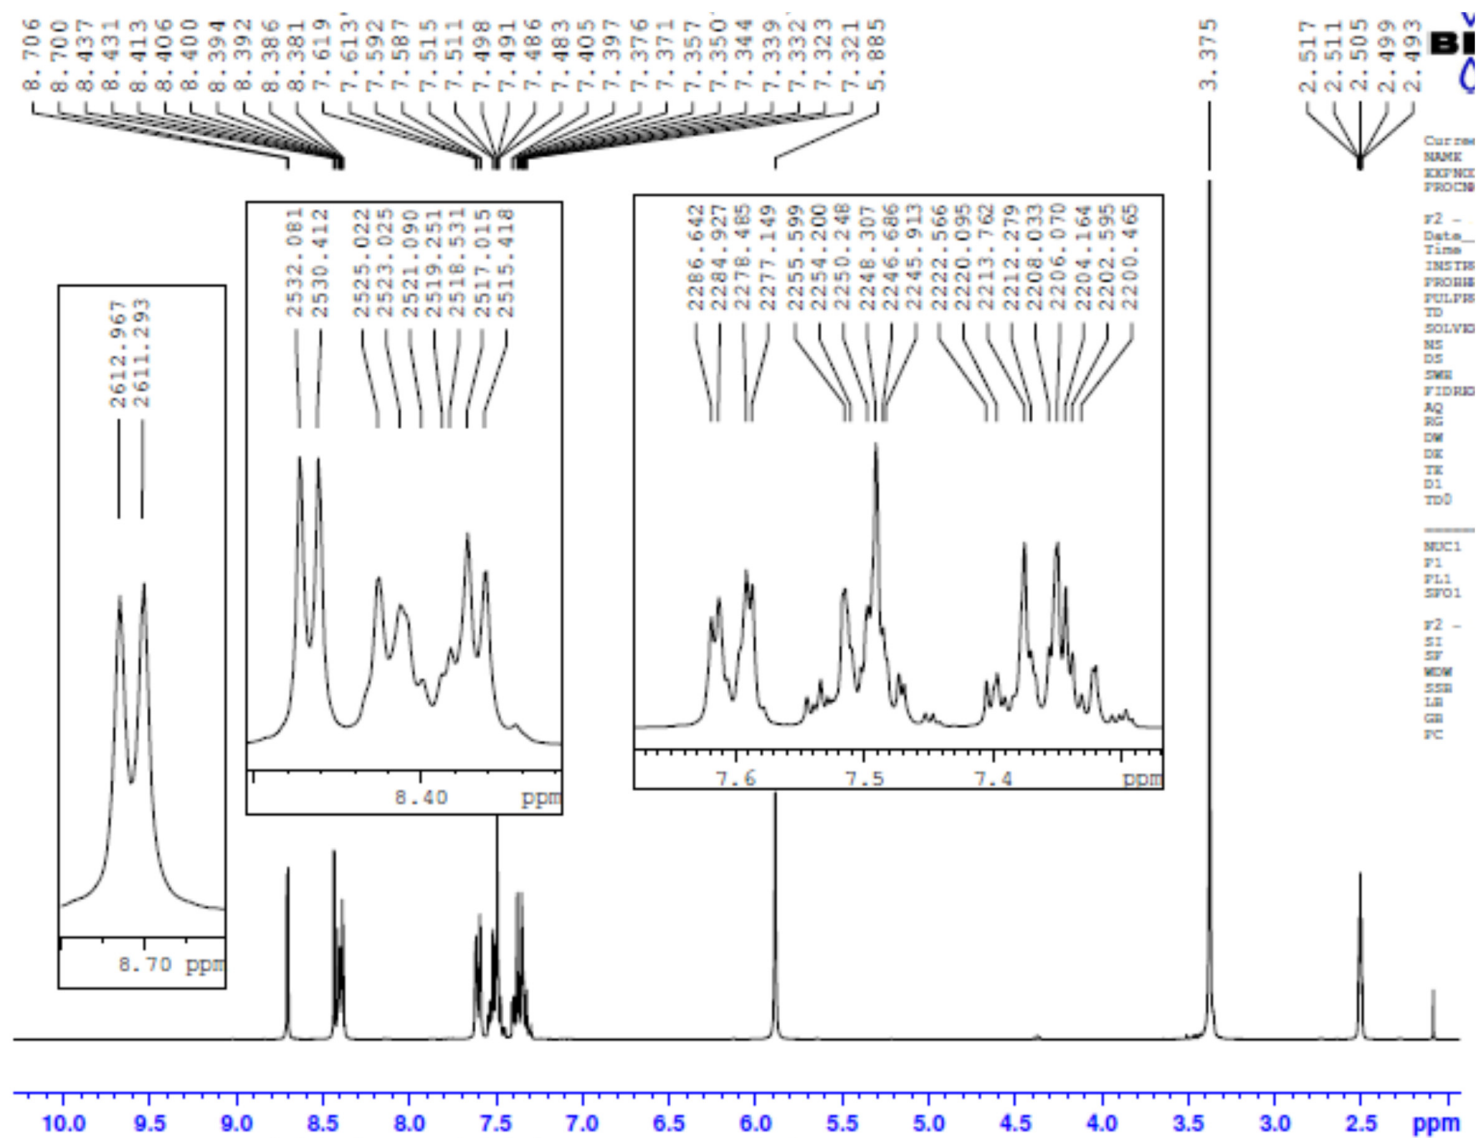

Figure S5:  $^1\text{H}$  NMR spectrum of **8**

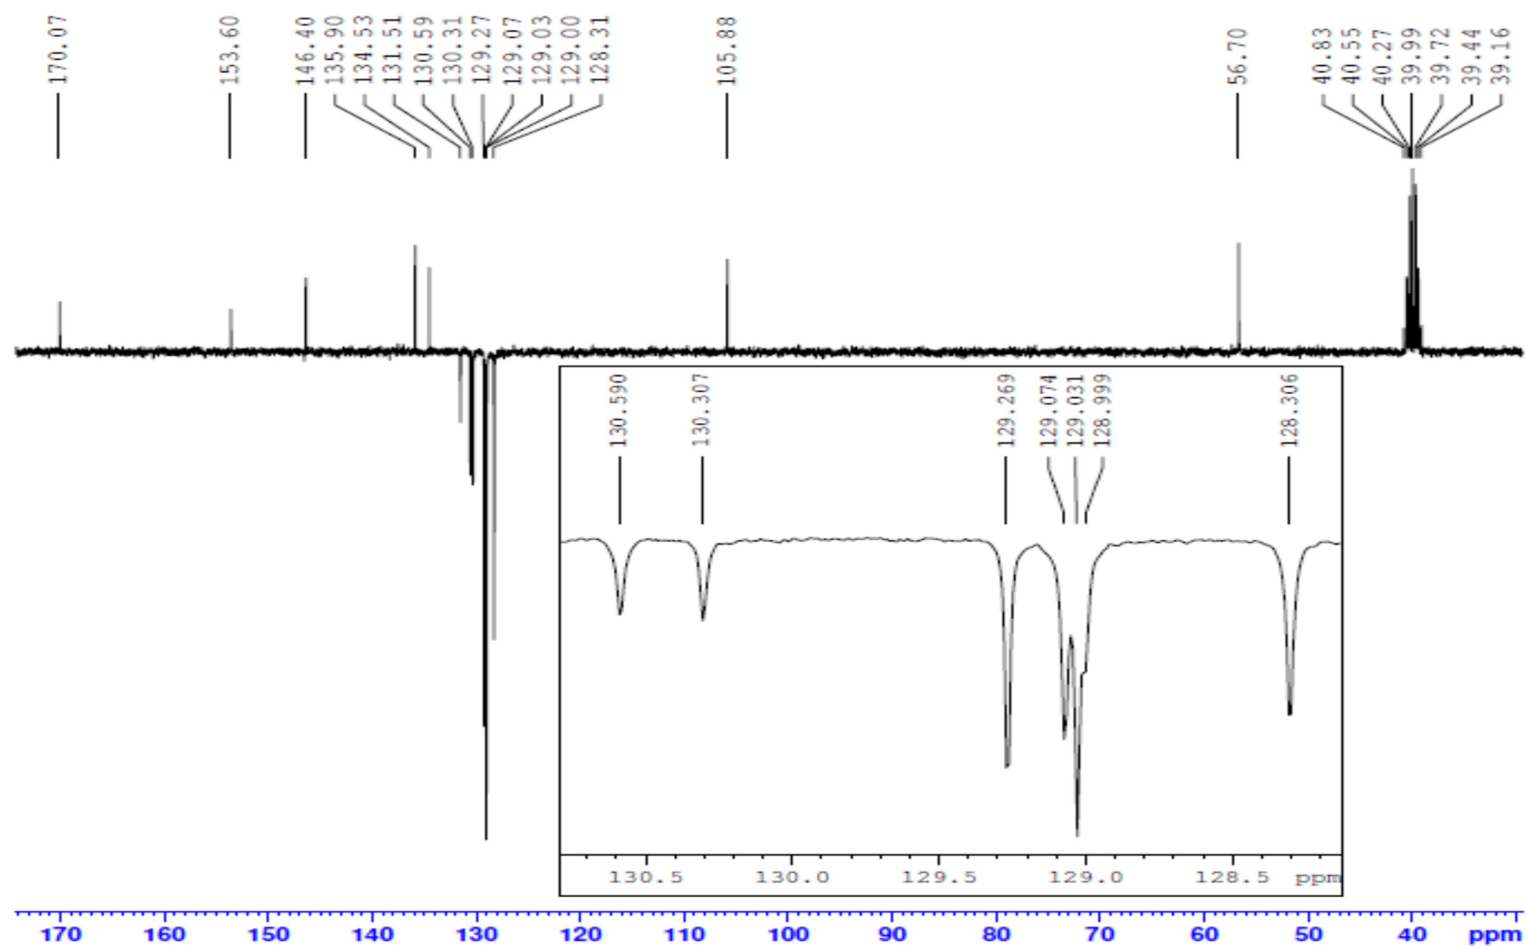

Figure S6: <sup>13</sup>C NMR spectrum of 8

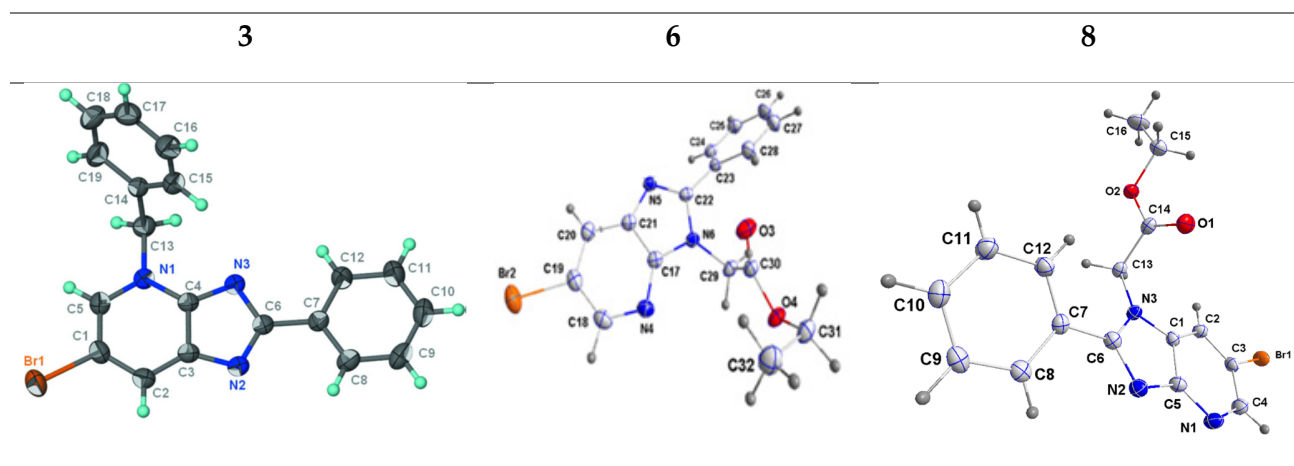

Figure S7: Ortep view of **3**, **6** and **8**

Table S1. Sample, Data collection and structure refinement crystal data for 3.

|                                                                        |                                                                                          |
|------------------------------------------------------------------------|------------------------------------------------------------------------------------------|
| <b>C<sub>19</sub>H<sub>14</sub>BrN<sub>3</sub></b>                     | <b>F(000) = 736</b>                                                                      |
| <b>Mr = 364.24</b>                                                     | <b>D<sub>x</sub> = 1.530 Mg m<sup>-3</sup></b>                                           |
| <b>Monoclinic, P2<sub>1</sub>/c</b>                                    | <b>Mo K<math>\alpha</math> radiation, <math>\lambda</math> = 0.71073 Å</b>               |
| <b>Hall symbol: -P 2ybc</b>                                            | <b>Cell parameters from 9876 reflections</b>                                             |
| <b>a = 8.6613 (6) Å</b>                                                | <b><math>\theta</math> = 2.4–27.2°</b>                                                   |
| <b>b = 19.7631 (13) Å</b>                                              | <b><math>\mu</math> = 2.60 mm<sup>-1</sup></b>                                           |
| <b>c = 9.3683 (6) Å</b>                                                | <b>T = 293 K</b>                                                                         |
| <b><math>\beta</math> = 99.647 (3)°</b>                                | <b>Prism, brown</b>                                                                      |
| <b>V = 1580.93 (18) Å<sup>3</sup></b>                                  | <b>0.28 × 0.24 × 0.20 mm</b>                                                             |
| <b>Z = 4</b>                                                           |                                                                                          |
| <b>Bruker X8 APEXII<br/>diffractometer</b>                             | <b>4613 independent reflections</b>                                                      |
| <b>Radiation source: fine-focus sealed tube</b>                        | <b>3492 reflections with I &gt; 2<math>\sigma</math>(I)</b>                              |
| <b>graphite</b>                                                        | <b>R<sub>int</sub> = 0.035</b>                                                           |
| <b><math>\varphi</math> and <math>\omega</math> scans</b>              | <b><math>\theta_{\text{max}}</math> = 30.1°, <math>\theta_{\text{min}}</math> = 2.4°</b> |
| <b>Absorption correction: multi-scan<br/>(SADABS; Sheldrick, 1996)</b> | <b>h = -12→11</b>                                                                        |
| <b>T<sub>min</sub> = 0.529, T<sub>max</sub> = 0.624</b>                | <b>k = -27→27</b>                                                                        |
| <b>57936 measured reflections</b>                                      | <b>l = -13→13</b>                                                                        |
| <b>Refinement on F<sup>2</sup></b>                                     | <b>Primary atom site location: structure invariant direct methods</b>                    |
| <b>Least-squares matrix: full</b>                                      | <b>Secondary atom site location: difference Fourier map</b>                              |



|                                  |                                                                                     |
|----------------------------------|-------------------------------------------------------------------------------------|
| <b>R[F2 &gt; 2σ(F2)] = 0.032</b> | Hydrogen site location: inferred from neighbouring sites                            |
| <b>wR(F2) = 0.098</b>            | H-atom parameters constrained                                                       |
| <b>S = 1.00</b>                  | $w = 1/[\sigma^2(F_o^2) + (0.0518P)^2 + 0.5269P]$<br>where $P = (F_o^2 + 2F_c^2)/3$ |
| <b>4613 reflections</b>          | $(\Delta/\sigma)_{\max} = 0.001$                                                    |
| <b>208 parameters</b>            | $\Delta\rho_{\max} = 0.63 \text{ e } \text{\AA}^{-3}$                               |
| <b>0 restraints</b>              | $\Delta\rho_{\min} = -0.51 \text{ e } \text{\AA}^{-3}$                              |

**Table S2. Sample, Data collection and structure refinement crystal data for 6.**

|                                            |                                                                                                      |
|--------------------------------------------|------------------------------------------------------------------------------------------------------|
| <b>Chemical formula</b>                    | <b>C<sub>16</sub>H<sub>14</sub>BrN<sub>3</sub>O<sub>2</sub></b>                                      |
| <b>Formula weight</b>                      | 360.21 g/mol                                                                                         |
| <b>Temperature</b>                         | 150(2) K                                                                                             |
| <b>Wavelength</b>                          | 0.71073 Å                                                                                            |
| <b>Crystal size</b>                        | 0.156 x 0.244 x 0.364 mm                                                                             |
| <b>Crystal habit</b>                       | colorless block                                                                                      |
| <b>Crystal system</b>                      | monoclinic                                                                                           |
| <b>Space group</b>                         | P 1 21/c 1                                                                                           |
| <b>Unit cell dimensions</b>                | a = 21.1444(14) Å    α = 90°<br>b = 7.6970(5) Å    β = 118.0730(10)°<br>c = 21.2671(14) Å    γ = 90° |
| <b>Volume</b>                              | 3054.0(3) Å <sup>3</sup>                                                                             |
| <b>Z</b>                                   | 8                                                                                                    |
| <b>Density (calculated)</b>                | 1.567 g/cm <sup>3</sup>                                                                              |
| <b>Absorption coefficient</b>              | 2.702 mm <sup>-1</sup>                                                                               |
| <b>F(000)</b>                              | 1456                                                                                                 |
| <b>Diffractometer</b>                      | Bruker Smart APEX CCD                                                                                |
| <b>Radiation source</b>                    | fine-focus sealed tube, MoKα                                                                         |
| <b>Theta range for data collection</b>     | 1.92 to 28.80°                                                                                       |
| <b>Index ranges</b>                        | -28<=h<=28, -10<=k<=10, -28<=l<=28                                                                   |
| <b>Reflections collected</b>               | 56392                                                                                                |
| <b>Independent reflections</b>             | 7958 [R(int) = 0.0369]                                                                               |
| <b>Coverage of independent reflections</b> | 99.6%                                                                                                |
| <b>Absorption correction</b>               | numerical                                                                                            |
| <b>Max. and min. transmission</b>          | 0.6780 and 0.4400                                                                                    |
| <b>Structure solution technique</b>        | direct methods                                                                                       |
| <b>Structure solution program</b>          | SHELXT (Sheldrick, 2015)                                                                             |

|                                            |                                                                                     |              |              |
|--------------------------------------------|-------------------------------------------------------------------------------------|--------------|--------------|
| <b>Refinement method</b>                   | Full-matrix least-squares on $F^2$                                                  |              |              |
| <b>Refinement program</b>                  | SHELXL-2014/7 (Sheldrick, 2014)                                                     |              |              |
| <b>Function minimized</b>                  | $\Sigma w(F_o^2 - F_c^2)^2$                                                         |              |              |
| <b>Data / restraints / parameters</b>      | 7958 / 0 / 399                                                                      |              |              |
| <b>Goodness-of-fit on <math>F^2</math></b> | 1.035                                                                               |              |              |
| <b><math>\Delta/\sigma_{\max}</math></b>   | 0.002                                                                               |              |              |
| <b>Final R indices</b>                     | 6411 data; $I > 2\sigma(I)$                                                         | R1 = 0.0307, | wR2 = 0.0755 |
|                                            | all data                                                                            | R1 = 0.0430, | wR2 = 0.0803 |
| <b>Weighting scheme</b>                    | $w = 1/[\sigma^2(F_o^2) + (0.0421P)^2 + 0.9304P]$<br>where $P = (F_o^2 + 2F_c^2)/3$ |              |              |
| <b>Largest diff. peak and hole</b>         | 0.782 and -0.639 $e\text{\AA}^{-3}$                                                 |              |              |
| <b>R.M.S. deviation from mean</b>          | 0.063 $e\text{\AA}^{-3}$                                                            |              |              |

Table S3. Sample, crystal data, data collection and structure refinement for 8

|                                     |                                                                                                                             |
|-------------------------------------|-----------------------------------------------------------------------------------------------------------------------------|
| Chemical formula                    | $\text{C}_{16}\text{H}_{14}\text{BrN}_3\text{O}_2$                                                                          |
| Formula weight                      | 360.21 g/mol                                                                                                                |
| Temperature                         | 150(2) K                                                                                                                    |
| Wavelength                          | 0.71073 Å                                                                                                                   |
| Crystal size                        | 0.060 x 0.150 x 0.210 mm                                                                                                    |
| Crystal habit                       | colorless plate                                                                                                             |
| Crystal system                      | monoclinic                                                                                                                  |
| Space group                         | P 1 21/n 1                                                                                                                  |
| Unit cell dimensions                | a = 14.6923(8) Å $\alpha = 90^\circ$<br>b = 6.1988(3) Å $\beta = 92.9110(10)^\circ$<br>c = 16.2254(8) Å $\gamma = 90^\circ$ |
| Volume                              | 1475.82(13) Å <sup>3</sup>                                                                                                  |
| Z                                   | 4                                                                                                                           |
| Density (calculated)                | 1.621 g/cm <sup>3</sup>                                                                                                     |
| Absorption coefficient              | 2.796 mm <sup>-1</sup>                                                                                                      |
| F(000)                              | 728                                                                                                                         |
| Diffractometer                      | Bruker Smart APEX CCD                                                                                                       |
| Radiation source                    | fine-focus sealed tube, MoK $\alpha$                                                                                        |
| Theta range for data collection     | 1.82 to 29.18°                                                                                                              |
| Index ranges                        | -20 ≤ h ≤ 20, -8 ≤ k ≤ 8, -22 ≤ l ≤ 21                                                                                      |
| Reflections collected               | 27419                                                                                                                       |
| Independent reflections             | 3981 [R(int) = 0.0436]                                                                                                      |
| Coverage of independent reflections | 99.7%                                                                                                                       |
| Absorption correction               | multi-scan                                                                                                                  |
| Max. and min. transmission          | 0.8500 and 0.5910                                                                                                           |
| Structure solution technique        | direct methods                                                                                                              |
| Structure solution program          | SHELXT (Sheldrick, 2015)                                                                                                    |

|                                            |                                                                           |
|--------------------------------------------|---------------------------------------------------------------------------|
| <b>Refinement method</b>                   | Full-matrix least-squares on $F^2$                                        |
| <b>Refinement program</b>                  | SHELXL-2014/7 (Sheldrick, 2014)                                           |
| <b>Function minimized</b>                  | $\Sigma w(F_o^2 - F_c^2)^2$                                               |
| <b>Data / restraints / parameters</b>      | 3981 / 0 / 200                                                            |
| <b>Goodness-of-fit on <math>F^2</math></b> | 1.064                                                                     |
| <b><math>\Delta/\sigma_{\max}</math></b>   | 0.001                                                                     |
| <b>Final R indices</b>                     | 3236 data; $I > 2\sigma(I)$ R1 = 0.0307, wR2 = 0.0781                     |
|                                            | all data R1 = 0.0414, wR2 = 0.0814                                        |
| <b>Weighting scheme</b>                    | $w = 1/[\sigma^2(F_o^2) + (0.0468P)^2]$<br>where $P = (F_o^2 + 2F_c^2)/3$ |
| <b>Largest diff. peak and hole</b>         | 0.758 and -0.349 $e\text{\AA}^{-3}$                                       |
| <b>R.M.S. deviation from mean</b>          | 0.079 $e\text{\AA}^{-3}$                                                  |

Table S4: the H-bond geometry (Å, °) in **3,6 and 8** molecules.

| <b>3</b>                                                              |             |            |            |                      |
|-----------------------------------------------------------------------|-------------|------------|------------|----------------------|
| <i>D</i> —H <i>A</i>                                                  | <i>D</i> —H | H <i>A</i> | D <i>A</i> | <i>D</i> —H <i>A</i> |
| <b>H24—O1H15B<sup>i</sup></b>                                         | 0.117       | 2.603      | 2.939      | 110                  |
| <b>H28—O3H31 A<sup>ii</sup></b>                                       | 0.136       | 2.652      | 2.311      | 119                  |
| <b>C13—N5 H13 A<sup>i</sup></b>                                       | 0.546       | 2.652      | 3.165      | 135.5                |
| Symmetry codes: (i) $-x+1, y+1/2, -z+3/2$ ; (ii) $x, -y+1/2, z-1/2$ . |             |            |            |                      |
| <b>6</b>                                                              |             |            |            |                      |
| <i>D</i> —H <i>A</i>                                                  | <i>D</i> —H | H <i>A</i> | D <i>A</i> | <i>D</i> —H <i>A</i> |
| <b>C14—O1 H16A<sup>i</sup></b>                                        | 0.119       | 2.601      | 1.206      | 124                  |
| <b>C5—N2 H13A<sup>ii</sup></b>                                        | 0.440       | 2.310      | 1.338      | 125                  |
| <b>C4—N1H4<sup>i</sup></b>                                            | 0.150       | 2.600      | 1.331      | 118.2                |
| Symmetry codes: (i) $x,-1+y,z$ (ii) $1-x,-y,1-z$ .                    |             |            |            |                      |
| <b>8</b>                                                              |             |            |            |                      |
| <i>D</i> —H <i>A</i>                                                  | <i>D</i> —H | H <i>A</i> | D <i>A</i> | <i>D</i> —H <i>A</i> |
| <b>C13—C14 H13A<sup>i</sup></b>                                       | 0.252       | 2.148      | 1.385      | 109.3                |
| <b>C15—C16 H10B<sup>ii</sup></b>                                      | 0.95        | 1.370      | 1.370      | 109.6                |
| Symmetry codes: (i) $1-x,1-y,1-z$ (ii) $1/2-x,-1/2+y,1/2-z$           |             |            |            |                      |
